# Supplementary material
Source: publisher site journal article supplement (https://www.degruyterbrill.com/publication/isbn/9783110309973/downloadAsset/9783110309973_Inhaltsverzeichnis.pdf)
Supplement: Supplementary file 1 [file 9783110309973_Inhaltsverzeichnis.pdf]

# Inhalt

## Einleitung — 1

### I. Theorie, Gegenstand, Methode — 7

1. Theoretischer Hintergrund der Arbeit — 7
  - 1.1 Die Diskursanalyse – deskriptiv oder kritisch? — 8
  - 1.2 Der Bedeutungsbegriff dieser Arbeit — 14
2. Gegenstand — 20
3. Zur Kombination qualitativer und quantitativer Methoden — 26
  - 3.1 Möglichkeiten und Grenzen der Korpuslinguistik — 27
  - 3.2 Möglichkeiten und Grenzen der Frame-, Topos- und Schlagwortanalyse — 31
    - 3.2.1 Die Frame-Analyse — 32
    - 3.2.2 Toposanalyse — 35
    - 3.2.3 Schlagwortanalyse — 39
  - 3.3 Möglichkeiten und Grenzen einer detaillierten Einzeltextanalyse — 44

### II. Das Konzept *Islam* – eine korpuslinguistische Analyse — 46

1. Korpuslinguistik als Methode der Diskurs- und Kulturanalyse — 47
2. Die Untersuchungskorpora — 49
3. Vorgehen — 54
4. Ergebnisse — 59
  - 4.1 Keywordanalyse — 60
  - 4.2 N-Gramme — 76
  - 4.3 Kollokationsanalysen — 93
    - 4.3.1 Kollokationsanalysen des Lexems *Islam* — 93
    - 4.3.2 Kollokationsanalyse der Adjektive *islamisch*, *muslimisch*, *christlich* und *islamistisch* — 113
    - 4.3.3 Adjektive unmittelbar vor *Muslim*, *Christ* und *Jude* — 121
    - 4.3.4 Adjektive unmittelbar vor *Islam*, *Christentum* und *Judentum* — 126
5. Resümee — 136

|             |                                                                       |
|-------------|-----------------------------------------------------------------------|
| <b>III.</b> | <b>Islamkonzepte im Kölner Moscheebaudiskurs — 138</b>                |
| 1.          | Zum Gegenstand — 139                                                  |
| 2.          | Vorgehen — 142                                                        |
| 3.          | Das Textkorpus — 160                                                  |
| 4.          | Ergebnis: Die vier Islamkonzepte — 161                                |
| 4.1         | Das Konzept A — 162                                                   |
| 4.1.1       | Frame-Analyse — 164                                                   |
| 4.1.1.1     | Kategorie: <i>Islam und Politik</i> — 164                             |
| 4.1.1.2     | Kategorie: <i>Islam und Gewaltbereitschaft</i> — 170                  |
| 4.1.1.3     | Kategorie: <i>Islam und die Unterdrückung der Frau</i> — 174          |
| 4.1.1.4     | Kategorie: <i>Islam und Kritik(fähigkeit)</i> — 176                   |
| 4.1.1.5     | Die Kotextualisierungen als Fillers im Konzept <i>Islam</i> (A) — 178 |
| 4.1.2       | Toposanalyse — 185                                                    |
| 4.1.3       | Schlagwortanalyse — 195                                               |
| 4.1.4       | Zusammenfassung der Analyseergebnisse (Konzept A) — 198               |
| 4.2         | Das Konzept B — 200                                                   |
| 4.2.1       | Frame-Analyse — 202                                                   |
| 4.2.1.1     | Kategorie: <i>Islam im Vergleich zu anderen Religionen</i> — 202      |
| 4.2.1.2     | Kategorie: <i>Islam und die deutsche Gesellschaft</i> — 206           |
| 4.2.1.3     | Die Kotextualisierungen als Fillers im Konzept <i>Islam</i> (B) — 212 |
| 4.2.2       | Toposanalyse — 215                                                    |
| 4.2.3       | Schlagwortanalyse — 224                                               |
| 4.2.4       | Zusammenfassung der Analyseergebnisse (Konzept B) — 226               |
| 4.3         | Die Konzepte C und D — 228                                            |
| 4.3.1       | Die Unterscheidung verschiedener Islamformen — 228                    |
| 4.3.2       | Frame-, Topos- und Schlagwortanalyse bezogen auf das Konzept C — 232  |
| 4.3.3       | Frame-, Topos- und Schlagwortanalyse bezogen auf das Konzept D — 247  |
| 4.3.4       | Zusammenfassung der Analyseergebnisse (Konzepte C und D) — 259        |
| 5.          | Resümee — 259                                                         |

#### **IV. Das Konzept *Islam* in Sarrazins *Deutschland schafft sich ab* — 263**

1. Der kommunikativ-pragmatische Rahmen — 265
2. Die Fundierung der Bedeutungskonstitution durch einen wissenschaftlichen Stil — 266
  - 2.1 Nominalstil — 268
  - 2.2 Fremdwörter/Fachwörter — 269
  - 2.3 Verwendung von Zahlen — 271
  - 2.4 Zitate von vermeintlichen Experten — 272
3. Formen der Bedeutungskonstitution in *Deutschland schafft sich ab* — 275
  - 3.1 Formen der Bedeutungskonstitution auf der lexikalischen Ebene — 275
    - 3.1.1 Bedeutungsbildung durch Schlagwörter — 275
    - 3.1.2 Bedeutungsbildung durch Wortneubildungen — 280
    - 3.1.3 Bedeutungsbildung durch qualifizierende Adjektive — 284
    - 3.1.4 Bedeutungsbildung durch Personalpronomen — 288
    - 3.1.5 Zusammenfassung — 292
  - 3.2 Formen der Bedeutungskonstitution auf der syntagmatischen Ebene — 293
    - 3.2.1 Bedeutungsbildung durch Prädikation — 293
    - 3.2.2 Bedeutungsbildung durch Fokus auf das Vorfeld — 298
    - 3.2.3 Bedeutungsbildung durch Aufzählung — 300
    - 3.2.4 Bedeutungsbildung durch Metaphorik — 303
    - 3.2.5 Bedeutungsbildung durch Präsupposition — 305
    - 3.2.6 Zusammenfassung — 308
  - 3.3 Formen der Bedeutungskonstitution durch im Handlungskontext Mitzuverstehendes — 309
    - 3.3.1 Bedeutungsbildung durch rhetorische Fragen — 311
    - 3.3.2 Bedeutungskonstitution durch Exemplifikation — 314
    - 3.3.3 Bedeutungsbildung durch Verallgemeinerung — 319
    - 3.3.4 Zusammenfassung — 322
4. Vergleich mit Konzept A im Kölner Moscheebaudiskurs — 322
5. Resümee — 325

#### **V. Fazit — 328**

##### **Literaturverzeichnis — 338**

1. Quellen — 338
2. Forschungsliteratur — 348
